# Supplementary material
Source: MDPI journal article supplement (https://www.mdpi.com/1424-2818/15/9/964)
Supplement: s1 [file s1]

## Supplementary Material

### An update of knowledge of the bacterial assemblages associated with the Mexican Caribbean corals

#### *Acropora palmata*, *Orbicella faveolata*, and *Porites porites*

Joicye Hernández-Zulueta <sup>1,2</sup>, Leopoldo Díaz-Pérez <sup>1</sup>, Alex Echeverría-Vega <sup>2</sup>, Gabriela Georgina Nava-Martínez <sup>4</sup>, Miguel Ángel García-Salgado <sup>4</sup>, Fabián A. Rodríguez-Zaragoza <sup>1\*</sup>

1. Laboratorio de Ecología Molecular, Microbiología y Taxonomía, Departamento de Ecología, Centro Universitario de Ciencias Biológicas y Agropecuarias, Universidad de Guadalajara, Av. Ing. Ramón Padilla Sánchez, Zapopan, Jalisco, México; joicye.hernandez@academicos.udg.mx: <https://orcid.org/0000-0002-3147-7069>; leopoldo.diaz@academicos.udg.mx: <https://orcid.org/0000-0003-0271-9257>; fabian.rzaragoza@academicos.udg.mx: <https://orcid.org/0000-0002-0066-4275>

2. Departamento de Biología Celular y Molecular, Centro Universitario de Ciencias Biológicas y Agropecuarias, Universidad de Guadalajara, Av. Ing. Ramón Padilla Sánchez, Zapopan, Jalisco, México; joicye.hernandez@academicos.udg.mx: <https://orcid.org/0000-0002-3147-7069>;

3. Centro de Investigación de Estudios Avanzados del Maule (CIEAM), Universidad Católica del Maule, Talca, Chile; aecheverria@ucm.cl: <https://orcid.org/0000-0002-0110-1079>

4. OCEANUS A.C. Calle Río verde Lote 7 Mza. 235. Col. Proterritorio, Chetumal, Quintana Roo, CP 77086, México; gnavam01@gmail.com: <https://orcid.org/0000-0001-8342-6389>; info@oceanus.org.mx: <https://orcid.org/0000-0001-5247-4695>

\*Corresponding author: Fabián A. Rodríguez-Zaragoza (fabian.rzaragoza@academicos.udg.mx)

**Table S1.** Average environmental variables at three sampling sites of the Mexican Caribbean. Codes: SST is sea surface temperature; SAL is salinity; pH is potential of hydrogen; NO<sub>3</sub><sup>-</sup> is nitrate; NO<sub>2</sub><sup>-</sup> is nitrite; PO<sub>4</sub> is phosphate; NH<sub>4</sub> is ammonium and Depth; CHK is Chankanaab; PTM is Puerto Morelos and PUM is Punta Maroma.

| Sites      | Variables |      |      |                              |                              |                 |                 |       |
|------------|-----------|------|------|------------------------------|------------------------------|-----------------|-----------------|-------|
|            | SST       | SAL  | pH   | NO <sub>3</sub> <sup>-</sup> | NO <sub>2</sub> <sup>-</sup> | PO <sub>4</sub> | NH <sub>4</sub> | Depth |
|            | (° C)     | ppt  |      | (μM)                         | (μM)                         | (μM)            | (μM)            | (m)   |
| <b>CHK</b> | 29.6      | 35.3 | 8.04 | 0.53                         | 0.005                        | 1.143           | 0.05            | 3.93  |
| <b>PTM</b> | 30.6      | 37.6 | 8.09 | 0.01                         | 0.005                        | 1.603           | 0.01            | 2.33  |
| <b>PUM</b> | 29.3      | 38.0 | 8.21 | 0.01                         | 0.003                        | 1.146           | 0.06            | 2.77  |

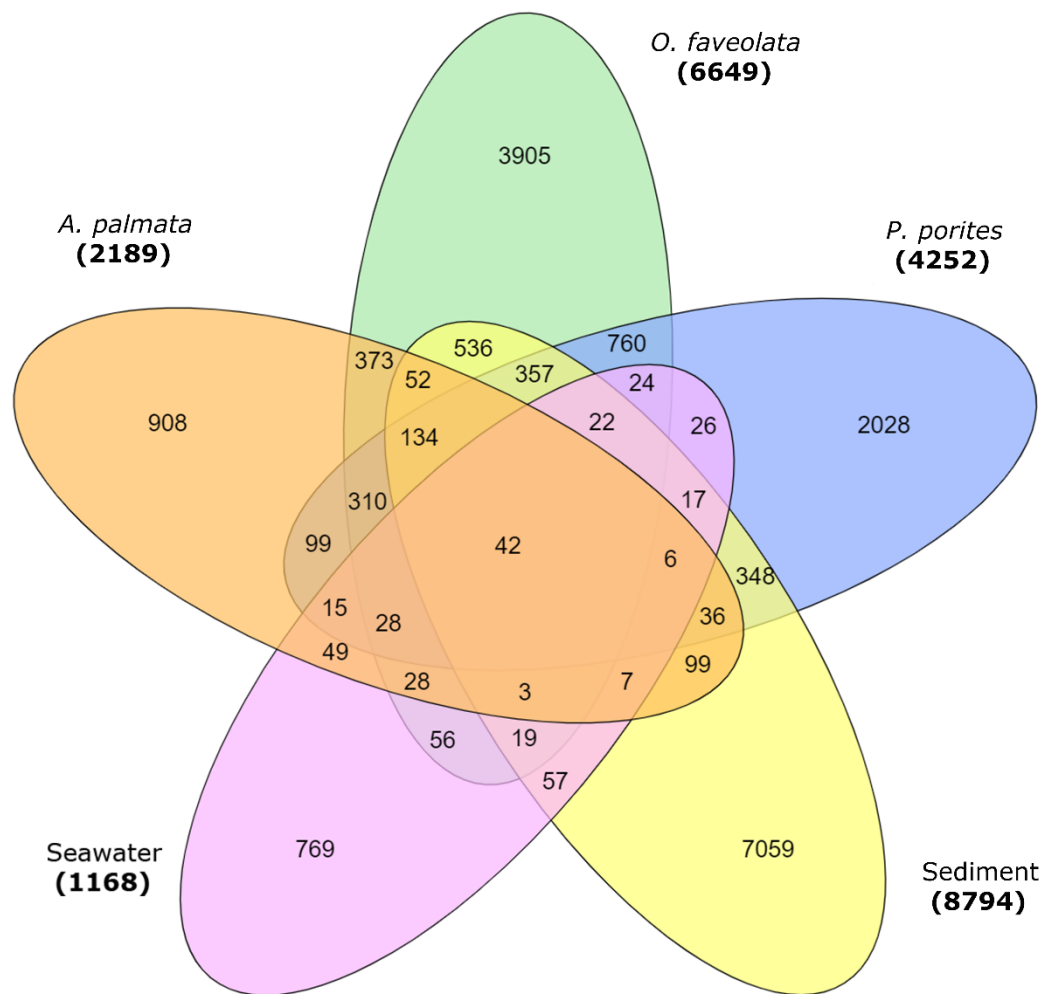

**Figure S1.** Venn's diagram showing number of amplicon sequence variants (ASVs) in each substrate.

**Table S2.** Results of the two-way crossed PERMANOVA with replication of the community attributes (ASV richness [*AR*], Shannon diversity [*H'*, nats]), and the bacterial ASV composition and abundance among substrates and sampling sites. Codes: C.V.(%) is the component of variation; P is the P-value. The P-values  $\leq 0.05$  are shown in bold.

| Source of variation | Community attributes |               |         | Bacterial ASVs' composition and abundance |               |         |
|---------------------|----------------------|---------------|---------|-------------------------------------------|---------------|---------|
|                     | Pseudo-F             | P             | C.V.(%) | Pseudo-F                                  | P             | C.V.(%) |
| Substrate           | 21.593               | <b>0.0001</b> | 42.6    | 6.423                                     | <b>0.0001</b> | 30.6    |
| Site                | 4.236                | <b>0.0091</b> | 13.1    | 2.012                                     | <b>0.0001</b> | 10.3    |
| Substrate x Site    | 1.976                | <b>0.0412</b> | 16.1    | 1.751                                     | <b>0.0001</b> | 19.7    |
| Residuals           |                      |               | 28.2    |                                           |               | 39.4    |

**Table S3.** Results of the Post hoc tests of the two-way crossed PERMANOVA of the community attributes (ASV richness [AR] and Shannon diversity [H', nats]) of the interaction Substrate x Site, considering the substrate within and among sites. Codes: P is the P-value; Ap is *A. palmata*; Of is *O. faveolata*; Pp is *P. porites*; Sw is seawater and Sd is sediment; CHK is Chankanaab; PTM is Puerto Morelos and PUM is Punta Maroma. The P-values  $\leq 0.05$  are shown in bold. Statistical significance was tested with a Monte-Carlo (MC) procedure because the number of permutations in the *Post hoc* tests was  $\leq 100$ .

| Pairwise comparisons                    | Groups      | t      | P (MC)        |
|-----------------------------------------|-------------|--------|---------------|
| <b>1. Site x Substrate by substrate</b> | Ap vs. Of   | 3.7989 | <b>0.0161</b> |
|                                         | Ap vs. Pp   | 2.7029 | <b>0.0394</b> |
|                                         | Ap vs. Sd   | 3.7003 | <b>0.0158</b> |
|                                         | Ap vs. Sw   | 0.8076 | <b>0.4874</b> |
|                                         | Of vs. Pp   | 1.5521 | 0.1631        |
|                                         | Of vs. Sd   | 1.8739 | 0.0887        |
|                                         | Of vs. Sw   | 6.1449 | <b>0.0017</b> |
|                                         | Pp vs. Sd   | 0.8382 | 0.4867        |
|                                         | Pp vs. Sw   | 2.8690 | <b>0.0248</b> |
| <b>Chankanaab</b>                       | Sd vs. Sw   | 5.3474 | <b>0.0029</b> |
|                                         | Ap vs. Of   | 2.9018 | <b>0.0266</b> |
|                                         | Ap vs. Pp   | 3.1097 | <b>0.0182</b> |
|                                         | Ap vs. Sd   | 12.242 | <b>0.0003</b> |
|                                         | Ap vs. Sw   | 2.9772 | <b>0.0415</b> |
|                                         | Of vs. Pp   | 0.5870 | 0.5958        |
|                                         | Of vs. Sd   | 2.3451 | 0.0763        |
|                                         | Of vs. Sw   | 2.0204 | 0.1006        |
|                                         | Pp vs. Sd   | 4.0514 | <b>0.0149</b> |
| <b>Punta Maroma</b>                     | Pp vs. Sw   | 1.8799 | 0.1088        |
|                                         | Sd vs. Sw   | 25.751 | <b>0.0001</b> |
|                                         | Ap vs. Of   | 1.7175 | 0.1496        |
|                                         | Ap vs. Pp   | 4.0448 | <b>0.0152</b> |
|                                         | Ap vs. Sd   | 4.3697 | <b>0.0054</b> |
|                                         | Ap vs. Sw   | 4.359  | <b>0.0119</b> |
|                                         | Of vs. Pp   | 1.3762 | 0.2236        |
|                                         | Of vs. Sd   | 1.9915 | 0.0847        |
|                                         | Of vs. Sw   | 1.1735 | 0.3035        |
| <b>Puerto Morelos</b>                   | Pp vs. Sd   | 1.9947 | 0.0956        |
|                                         | Pp vs. Sw   | 1.0222 | 0.3685        |
|                                         | Sd vs. Sw   | 2.6700 | <b>0.0434</b> |
| <b>2. Site x Substrate by site</b>      | CHK vs. PUM | 0.3143 | 0.8617        |
|                                         | CHK vs. PTM | 1.8898 | 0.1203        |
|                                         | PUM vs. PTM | 2.0275 | 0.1040        |
| <b>Acropora palmata</b>                 | CHK vs. PUM | 0.1668 | 0.9396        |
|                                         | CHK vs. PTM | 1.8846 | 0.1274        |
|                                         | PUM vs. PTM | 1.5384 | 0.1765        |
| <b>Orbicella faveolata</b>              | CHK vs. PUM | 0.1664 | 0.9548        |
|                                         | CHK vs. PTM | 1.0030 | 0.3816        |
|                                         | PUM vs. PTM | 0.8979 | 0.4475        |
| <b>Porites porites</b>                  | CHK vs. PUM | 0.1664 | 0.9548        |
|                                         | CHK vs. PTM | 1.0030 | 0.3816        |
|                                         | PUM vs. PTM | 0.8979 | 0.4475        |

|                 |             |        |               |
|-----------------|-------------|--------|---------------|
| <b>Seawater</b> | CHK vs. PUM | 1.1046 | <b>0.0332</b> |
|                 | CHK vs. PTM | 1.4141 | 0.2351        |
|                 | PUM vs. PTM | 0.6199 | 0.5936        |
| <b>Sediment</b> | CHK vs. PUM | 10.832 | <b>0.0002</b> |
|                 | CHK vs. PTM | 1.1091 | 0.3334        |
|                 | PUM vs. PTM | 1.3599 | 0.2408        |

---

**Table S4.** Results of the Post hoc tests of the two-way crossed PERMANOVA of the bacterial ASV composition and abundance of the interaction Substrate x Site, considering the substrate within and among sites. Codes: P is the P-value; Ap is *A. palmata*; Of is *O. faveolata*; Pp is *P. porites*; Sw is seawater and Sd is sediment; CHK is Chankanaab; PTM is Puerto Morelos and PUM is Punta Maroma. The P-values  $\leq 0.05$  are shown in bold. Statistical significance was tested with a Monte-Carlo (MC) procedure because the number of permutations in the *Post hoc* tests was  $\leq 100$ .

| Pairwise tests                          | Groups      | t      | P (MC)        |
|-----------------------------------------|-------------|--------|---------------|
| <b>1. Site x Substrate by substrate</b> |             |        |               |
| <b>Chankanaab</b>                       | Ap vs. Of   | 1.2666 | 0.2081        |
|                                         | Ap vs. Pp   | 1.3607 | 0.1572        |
|                                         | Ap vs. Sd   | 1.5101 | 0.0975        |
|                                         | Ap vs. Sw   | 2.1128 | <b>0.0286</b> |
|                                         | Of vs. Pp   | 1.3535 | 0.1661        |
|                                         | Of vs. Sd   | 1.7048 | 0.0581        |
|                                         | Of vs. Sw   | 2.6953 | <b>0.0130</b> |
|                                         | Pp vs. Sd   | 1.6503 | 0.0700        |
|                                         | Pp vs. Sw   | 2.5874 | <b>0.0129</b> |
|                                         | Sd vs. Sw   | 2.6263 | <b>0.0124</b> |
| <b>Punta Maroma</b>                     | Ap vs. Of   | 1.2085 | 0.2461        |
|                                         | Ap vs. Pp   | 1.3699 | 0.1512        |
|                                         | Ap vs. Sd   | 1.9483 | <b>0.0304</b> |
|                                         | Ap vs. Sw   | 2.4327 | <b>0.0139</b> |
|                                         | Of vs. Pp   | 1.1242 | 0.3211        |
|                                         | Of vs. Sd   | 1.6036 | 0.0716        |
|                                         | Of vs. Sw   | 2.1717 | <b>0.0248</b> |
|                                         | Pp vs. Sd   | 1.6207 | 0.0762        |
|                                         | Pp vs. Sw   | 2.1972 | <b>0.0227</b> |
|                                         | Sd vs. Sw   | 3.345  | <b>0.0057</b> |
| <b>Puerto Morelos</b>                   | Ap vs. Of   | 1.5633 | 0.0822        |
|                                         | Ap vs. Pp   | 1.6190 | 0.0701        |
|                                         | Ap vs. Sd   | 1.7088 | 0.0547        |
|                                         | Ap vs. Sw   | 2.3703 | <b>0.0198</b> |
|                                         | Of vs. Pp   | 1.4441 | 0.1157        |
|                                         | Of vs. Sd   | 1.4894 | 0.1051        |
|                                         | Of vs. Sw   | 2.2744 | <b>0.0225</b> |
|                                         | Pp vs. Sd   | 1.6343 | 0.0624        |
|                                         | Pp vs. Sw   | 2.5529 | <b>0.0140</b> |
|                                         | Sd vs. Sw   | 2.5493 | <b>0.0129</b> |
| <b>2. Site x Substrate by site</b>      |             |        |               |
| <b><i>Acropora palmata</i></b>          | CHK vs. PUM | 1.2065 | 0.2588        |
|                                         | CHK vs. PTM | 1.2787 | 0.2014        |
|                                         | PUM vs. PTM | 1.3421 | 0.1631        |
| <b><i>Orbicella faveolata</i></b>       | CHK vs. PUM | 1.0555 | 0.3790        |
|                                         | CHK vs. PTM | 1.1726 | 0.2865        |
|                                         | PUM vs. PTM | 1.1052 | 0.1631        |
| <b><i>Porites porites</i></b>           | CHK vs. PUM | 1.3117 | 0.1825        |
|                                         | CHK vs. PTM | 1.5919 | 0.0814        |
|                                         | PUM vs. PTM | 1.1304 | 0.3159        |
| <b>Seawater</b>                         | CHK vs. PUM | 2.1230 | <b>0.0222</b> |
|                                         | CHK vs. PTM | 2.9256 | <b>0.0078</b> |

|                 |             |        |               |
|-----------------|-------------|--------|---------------|
|                 | PUM vs. PTM | 2.0200 | <b>0.0267</b> |
| <b>Sediment</b> | CHK vs. PUM | 1.7394 | 0.0521        |
|                 | CHK vs. PTM | 1.4674 | 0.1137        |
|                 | PUM vs. PTM | 1.1217 | 0.3191        |

---



**Table S5.** Dominant bacteria families of each substrate within each site. Codes: Ap is *A. palmata*; Of is *O. faveolata*; Pp is *P. porites*; Sw is seawater and Sd is sediment.

| Sites<br>Family        | Substrate | Chankanaab |      |      |      |      | Puerto Morelos |       |      |      |      | Punta Maroma |      |      |      |      |
|------------------------|-----------|------------|------|------|------|------|----------------|-------|------|------|------|--------------|------|------|------|------|
|                        |           | Ap         | Of   | Pp   | Sw   | Sd   | Ap             | Of    | Pp   | Sw   | Sd   | Ap           | Of   | Pp   | Sw   | Sd   |
| Rhodobacteraceae       |           | 999        | 1842 | 1177 | 6037 | 1815 | 177            | 21744 | 2657 | 5250 | 998  | 418          | 1397 | 1977 | 6756 | 888  |
| Amoebophilaceae        |           | 3357       | 1797 | 3503 | 6    | 370  | 2716           | 371   | 933  | 6    | 74   | 11149        | 1228 | 411  | 6    | 44   |
| Cryomorphaceae         |           | 139        | 55   | 22   | 9285 | 0    | 66             | 142   | 132  | 4819 | 38   | 34           | 54   | 112  | 5499 | 46   |
| Kiloniellaceae         |           | 543        | 2668 | 2461 | 0    | 50   | 2802           | 1459  | 2221 | 4    | 1833 | 505          | 2283 | 2231 | 4    | 1274 |
| Spirochaetaceae        |           | 10097      | 271  | 428  | 0    | 9    | 430            | 150   | 47   | 0    | 14   | 3300         | 550  | 84   | 0    | 76   |
| Myxococcaceae          |           | 870        | 220  | 52   | 14   | 76   | 11205          | 103   | 99   | 7    | 85   | 2114         | 91   | 234  | 11   | 107  |
| Cyanobiaceae           |           | 36         | 0    | 5    | 3975 | 610  | 17             | 67    | 9    | 3861 | 46   | 42           | 25   | 60   | 5713 | 30   |
| Rhizobiaceae           |           | 1197       | 1130 | 701  | 1    | 960  | 323            | 213   | 5468 | 0    | 555  | 596          | 878  | 473  | 3    | 430  |
| Pirellulaceae          |           | 115        | 339  | 355  | 21   | 4490 | 7              | 280   | 378  | 2    | 3300 | 106          | 422  | 425  | 12   | 2796 |
| Cyclobacteriaceae      |           | 6537       | 610  | 547  | 72   | 41   | 1837           | 336   | 752  | 37   | 457  | 710          | 352  | 385  | 44   | 389  |
| Woeseiaceae            |           | 333        | 1581 | 623  | 0    | 195  | 14             | 874   | 860  | 4    | 2429 | 133          | 1043 | 984  | 5    | 2223 |
| Nitrosopumilaceae      |           | 160        | 2228 | 1348 | 5    | 6    | 5              | 776   | 106  | 10   | 607  | 43           | 1816 | 1378 | 6    | 1078 |
| Flavobacteriaceae      |           | 197        | 369  | 198  | 1038 | 35   | 33             | 256   | 346  | 3380 | 180  | 102          | 157  | 367  | 2646 | 156  |
| Nitrosococcaceae       |           | 94         | 543  | 1435 | 2    | 194  | 16             | 98    | 154  | 0    | 2214 | 85           | 1091 | 701  | 2    | 1955 |
| Terasakiellaceae       |           | 2291       | 693  | 66   | 2    | 0    | 1395           | 91    | 319  | 11   | 19   | 1756         | 419  | 58   | 6    | 13   |
| Thermoanaerobaculaceae |           | 144        | 784  | 436  | 0    | 705  | 9              | 121   | 663  | 0    | 841  | 90           | 390  | 777  | 0    | 1376 |
| Haliaceae              |           | 140        | 138  | 48   | 780  | 286  | 1              | 81    | 105  | 792  | 972  | 26           | 42   | 549  | 731  | 1018 |
| Stappiaceae            |           | 491        | 235  | 276  | 417  | 380  | 5              | 116   | 1072 | 90   | 42   | 94           | 755  | 915  | 82   | 51   |
| Microtrichaceae        |           | 135        | 583  | 650  | 21   | 264  | 12             | 199   | 393  | 12   | 894  | 179          | 656  | 392  | 25   | 731  |
| Saprospiraceae         |           | 92         | 598  | 192  | 4    | 21   | 65             | 176   | 992  | 74   | 662  | 21           | 233  | 976  | 60   | 715  |

**Table S6.** BIO-ENV outputs with the best subsets of environmental variables correlated with the bacterial assemblage per substrate. Codes: P is the P-value;  $\rho$  correspond to Spearman correlación; SST is sea surface temperature; SAL is salinity; NO<sub>2</sub><sup>-</sup> is Nitrite; NO<sub>3</sub><sup>-</sup> is Nitrate; NH<sub>4</sub> is ammonium; PO<sub>4</sub> is phosphate; pH is the potential of hydrogen . The P-values  $\leq 0.05$  are shown in bold.

| Substrate           | $\rho$ | P             | Best subset                                                                               |
|---------------------|--------|---------------|-------------------------------------------------------------------------------------------|
| <i>A. palmata</i>   | 0.396  | <b>0.042</b>  | SST, SAL, DEPHT                                                                           |
| <i>O. faveolata</i> | 0.060  | 0.348         | SST, SAL                                                                                  |
|                     | 0.061  | 0.340         | SST, SAL, pH                                                                              |
| <i>P. porites</i>   | 0.403  | <b>0.008</b>  | SST, SAL, NO <sub>3</sub> <sup>-</sup> , NH <sub>4</sub>                                  |
|                     | 0.396  | <b>0.011</b>  | SST, NH <sub>4</sub>                                                                      |
|                     | 0.389  | <b>0.005</b>  | SST, NH <sub>4</sub> , PO <sub>4</sub>                                                    |
|                     | 0.376  | <b>0.009</b>  | SST, SAL, NH <sub>4</sub>                                                                 |
|                     | 0.369  | <b>0.022</b>  | SST, NO <sub>3</sub> <sup>-</sup> , NH <sub>4</sub>                                       |
|                     | 0.367  | <b>0.024</b>  | SST, DEPHT, NO <sub>3</sub> <sup>-</sup> , NH <sub>4</sub>                                |
|                     | 0.365  | <b>0.017</b>  | SST, DEPHT, NO <sub>3</sub> <sup>-</sup> , NH <sub>4</sub> , PO <sub>4</sub>              |
|                     | 0.363  | <b>0.015</b>  | SST, DEPHT, NO <sub>3</sub> <sup>-</sup> , NH <sub>4</sub>                                |
|                     | 0.360  | <b>0.018</b>  | SST, SAL, DEPHT, NO <sub>3</sub> <sup>-</sup> , NH <sub>4</sub>                           |
|                     | 0.358  | <b>0.011</b>  | SST, SAL, NO <sub>3</sub> <sup>-</sup> , NH <sub>4</sub> , PO <sub>4</sub>                |
| Seawater            | 0.769  | <b>0.005</b>  | SAL, NO <sub>2</sub> <sup>-</sup>                                                         |
|                     | 0.757  | <b>0.008</b>  | SAL                                                                                       |
|                     | 0.754  | <b>0.0001</b> | SAL, DEPTH, NO <sub>2</sub> <sup>-</sup> , NH <sub>4</sub>                                |
|                     | 0.753  | <b>0.003</b>  | SAL, NO <sub>2</sub> <sup>-</sup> , NO <sub>3</sub> <sup>-</sup>                          |
|                     | 0.744  | <b>0.003</b>  | SAL, DEPTH, NO <sub>2</sub> <sup>-</sup>                                                  |
|                     | 0.731  | <b>0.0008</b> | SAL, DEPTH, NO <sub>2</sub> <sup>-</sup> , NO <sub>3</sub> <sup>-</sup> , NH <sub>4</sub> |
|                     | 0.723  | <b>0.0007</b> | SAL, NO <sub>2</sub> <sup>-</sup> , NH <sub>4</sub>                                       |
|                     | 0.715  | <b>0.003</b>  | SAL, DEPTH, NO <sub>2</sub> <sup>-</sup> , NO <sub>3</sub> <sup>-</sup>                   |
|                     | 0.714  | <b>0.002</b>  | SAL, pH, DEPTH, NO <sub>2</sub> <sup>-</sup>                                              |
|                     | 0.707  | <b>0.0004</b> | SAL, DEPTH, NO <sub>2</sub> <sup>-</sup> , NH <sub>4</sub> , PO <sub>4</sub>              |
| Sediments           | 0.567  | <b>0.033</b>  | SAL, NO <sub>2</sub> <sup>-</sup> , NO <sub>3</sub> <sup>-</sup>                          |
|                     | 0.551  | <b>0.006</b>  | NO <sub>2</sub> <sup>-</sup>                                                              |
|                     | 0.549  | <b>0.006</b>  | NO <sub>2</sub> <sup>-</sup> , NO <sub>3</sub> <sup>-</sup>                               |
|                     | 0.503  | <b>0.015</b>  | SAL, NO <sub>2</sub> <sup>-</sup>                                                         |
|                     | 0.494  | <b>0.011</b>  | SAL, pH, NO <sub>2</sub> <sup>-</sup> , NO <sub>3</sub> <sup>-</sup>                      |
|                     | 0.491  | <b>0.011</b>  | SST, SAL, NO <sub>2</sub> <sup>-</sup> , NO <sub>3</sub> <sup>-</sup>                     |
|                     | 0.484  | <b>0.01</b>   | SAL, NO <sub>2</sub> <sup>-</sup> , NO <sub>3</sub> <sup>-</sup> , NH <sub>4</sub>        |
|                     | 0.467  | <b>0.015</b>  | SST, NO <sub>2</sub> <sup>-</sup> , NO <sub>3</sub> <sup>-</sup>                          |
|                     | 0.451  | <b>0.019</b>  | SAL, NO <sub>2</sub> <sup>-</sup> , NO <sub>3</sub> <sup>-</sup> , PO <sub>4</sub>        |
|                     | 0.450  | <b>0.025</b>  | SAL                                                                                       |
